# Supplementary material
Source: PubMed Central journal article supplement (PMC5419489)
Supplement: 467FileS1.pdf [file 467FileS1.pdf]

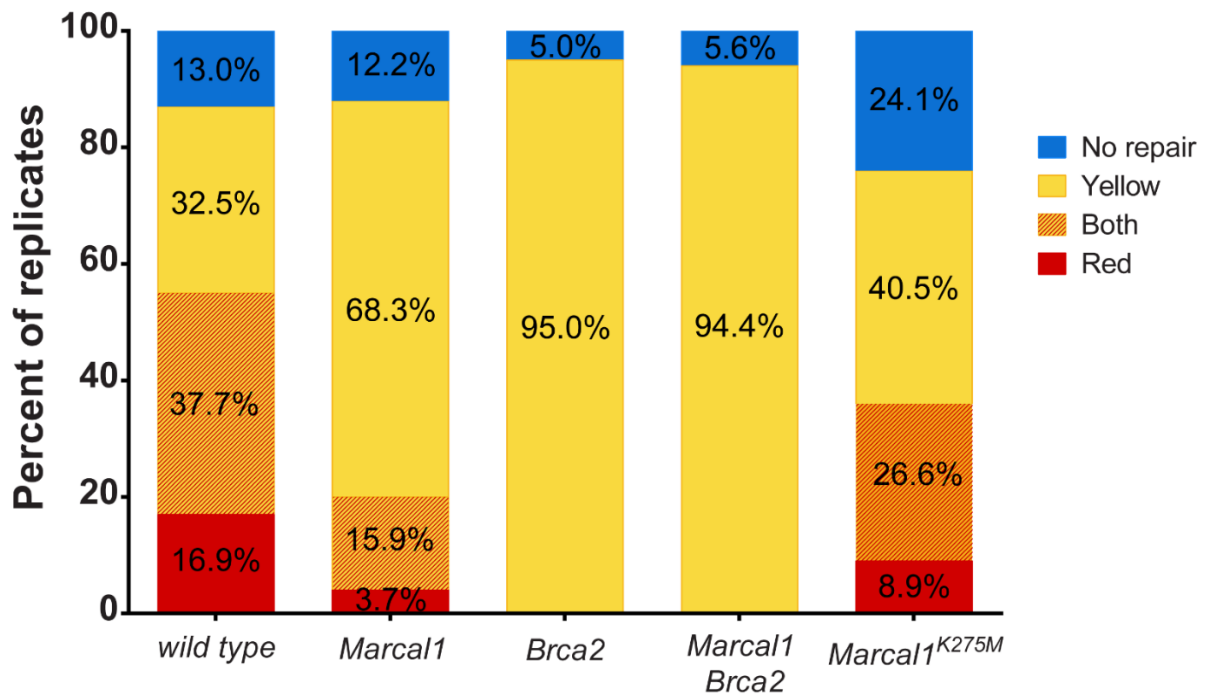

single males = 77                      82                      40                      72                      79

**Figure S1. Distribution of repair events per replicate (single male).** Each male (replicate) from the  $P\{w^a\}$  assay was categorized according to the distribution of repair events observed in his progeny and the data are displayed as a percentage of all males assayed in each genotype. Red indicates red-eyed progeny were observed; yellow indicates yellow-eyed progeny; both indicates red- and yellow-eyed progeny; and no repair indicates no red or yellow-eyed progeny were observed. Apricot-eyed progeny were observed in the progeny of every male.

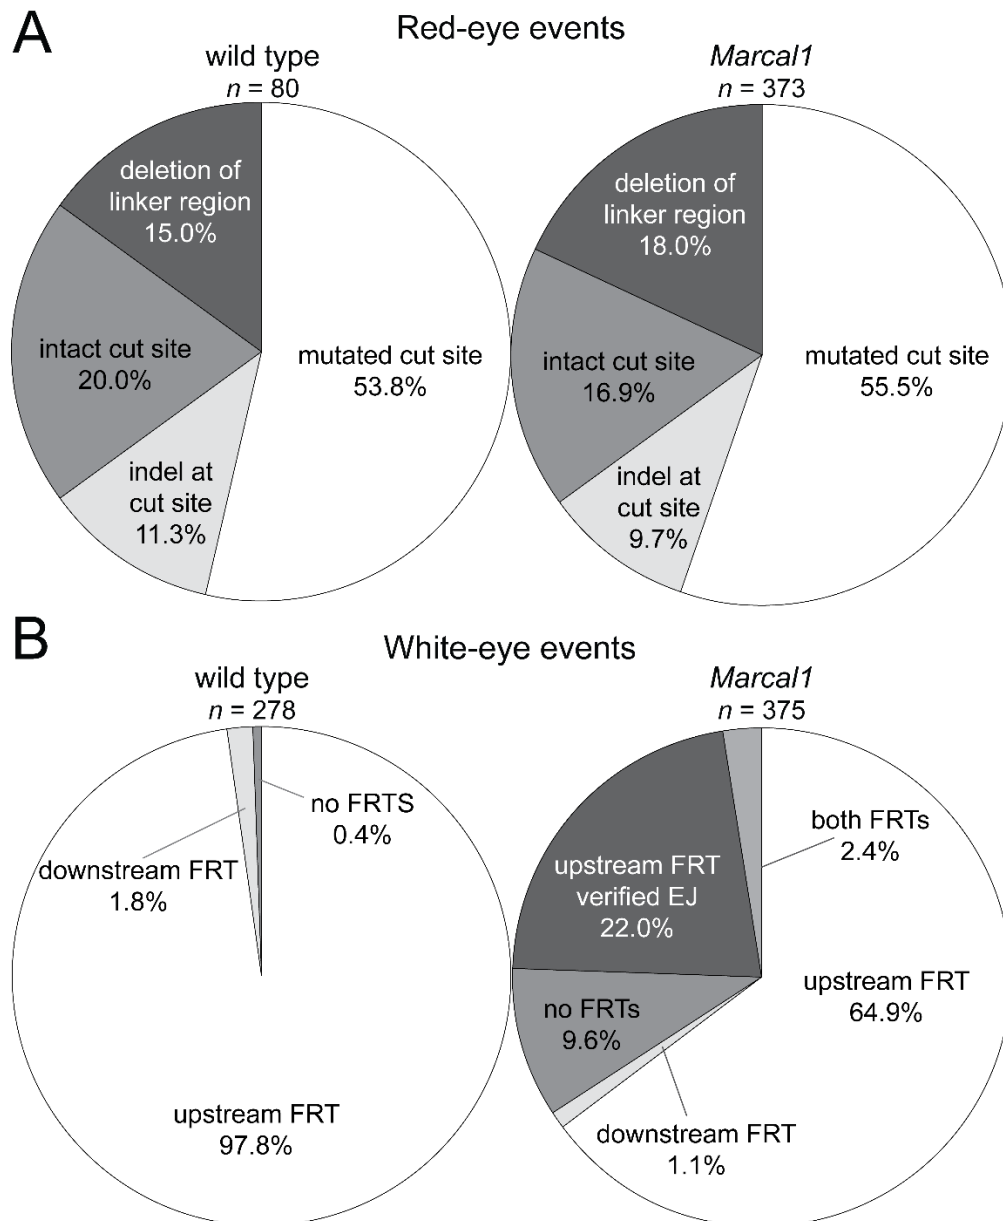

**Figure S2. Distribution of  $P\{w/w\}$  events in wild type and *Marcal1* mutants after molecular analysis.** A) Distribution of molecularly analyzed events from collected red-eyed progeny as a percentage of total red analyzed events (listed below genotype). Mutated cut site: amplified band (primer set *wlw\_cut*, Table S3) was not cut with *I-SceI*; indel at cut site: band was smaller or larger than predicted; intact cut site: band was cut with *I-SceI*; deletion of linker region: no amplification with primer set. B) Distribution of molecularly analyzed events from collected white-eyed progeny as a percentage of total white analyzed events (listed below genotype). Upstream FRT: only FRT associated with upstream *mini-w* amplified (primer set, Table S3) (categorized as annealed events); upstream FRT verified EJ: larger or smaller than predicted products from whole construct amplification (categorized as EJ events); downstream FRT: only downstream FRT amplified (verified to be in the upstream locus, removed from final data set); both FRTs: both amplified (categorized as EJ events); no FRTs: no amplification (categorized as EJ events).

| Mutagen                 | Dosage               | Biological replicates | Unexposed progeny | Exposed progeny |
|-------------------------|----------------------|-----------------------|-------------------|-----------------|
| Methyl methanesulfonate | 3.23 mM              | 16                    | 2864              | 1397            |
| Nitrogen mustard        | 0.2 mM               | 22                    | 3828              | 3131            |
| Hydroxyurea             | 100 mM               | 22                    | 3964              | 1841            |
| Etoposide               | 10 mM                | 9                     | 1098              | 876             |
| Camptothecin            | 0.05 mM              | 26                    | 3432              | 2233            |
| Ionizing radiation      | 2000 rads<br>(20 Gy) | 19                    | 2196              | 1395            |

**Table S1. Dosage and sample sizes of mutagen exposure experiment.** *Marcal1* null mutants were treated with each mutagen in separate experiments as described in Materials and Methods. Biological replicates refers to individual vials assayed, each containing a single male (ratios of *wt.mutant* survival were calculated per vial). Progeny counts are the aggregated total number of flies scored for each mutagen.

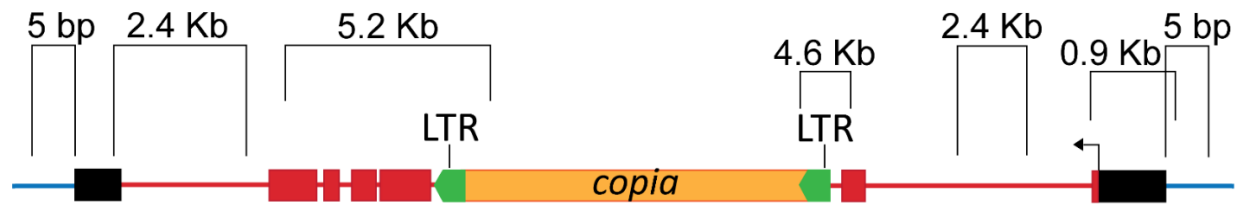

| Description                                                    | Primer 1                          | Primer 2                 |
|----------------------------------------------------------------|-----------------------------------|--------------------------|
| 5 bp right side                                                | CCGCGGCCGCGGACCACCTTATGTTA<br>TTT | GCCTTGCTTCTTCCACACAGCGTG |
| 0.9 Kb right side                                              | CCCTCGCAGCGTACTATTGAT             | AGATGGGTGTTTGCTGCCTCCG   |
| 2.4 Kb right side                                              | GAGCGAGATGGCCATATGGCTG            | CGTTGTTTGCACGTCTCGCTCG   |
| 4.6 Kb right side<br>(into <i>copia</i> )                      | GGACTGGGCCATAACCTGTTG             | GAGCGACACATACCGGCG       |
| 5 bp left side                                                 | CCGCGGCCGCGGACCACCTTATGTTA<br>TTT | ACCATTGCAAGCTACATAGCTGAC |
| 2 Kb left side                                                 | GACTGTGCGTTAGGTCCTGT              | CGTTTCGTAGTTGCTCTTTTCGC  |
| 5.2 Kb left side<br>(all <i>w</i> exons into<br><i>copia</i> ) | TGCCAGAGAGCAAGTTCAGA              | GAGGTCATCCTGCTGGACAT     |

**Table S2.  $P\{w^a\}$  primers.** Diagram above table depicts PCR products. Sizes represent synthesis from break end, not PCR product size. The null *white* (*w*) gene in the  $ywP\{w^a\}$  genotype is a partial deletion of the 5' end of *w* leaving the 3' end intact. The left side of the construct above is identical to the 3' end of *w*; therefore, all PCRs of the left end must be anchored in the *P*-element ends or in *copia* to prevent amplification of the background copy of *w*.

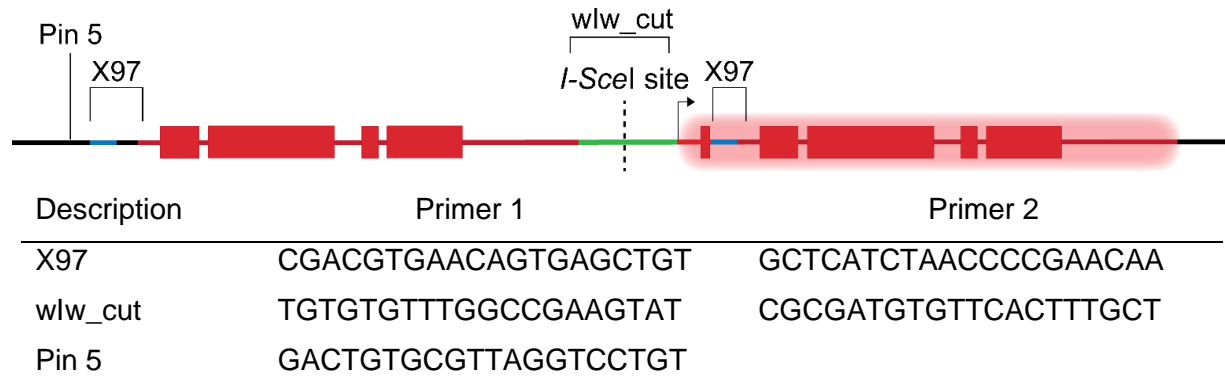

**Table S3. *P{w/w}* primers.** Diagram above table depicts PCR products. The w/w\_cut primer set was used to amplify the *I-SceI* cut site in red-eyed repair events. The X97 primer set was used to assess annealing via SSA in white-eyed repair events. The upstream product is 480 bp whereas the downstream product is 369 bp. Presence of only the upstream product represents correct annealing via SSA; presence of both indicates EJ that abolishes *mini-white* function; the presence of only the downstream product was rare and verified to be in the upstream location using the Pin 5 and X97 primer 2 set. These events are interpreted as SSA with small deletions in the X97 region. Lack of amplification with the X97 primer set indicates EJ.
